# Supplementary material for: Literature review of imaging, pathological diagnosis, and outcomes of metachronous lung and pancreatic metastasis of cecal cancer
Source: Research Square preprint supplement (doi:10.21203/rs.3.rs-1654145/v1), 2022-05-31
Supplement: Supplementary file 2 [file 4a04f0f4b7d6faa2807dabd3.docx]

**Table 2.** Characteristics of patients who developed pancreatic metastasis from colorectal cancer.

| NO. | First Author/Year | Age | Sex | Time to panpcreas Metastasis(mo) | Synchronous(Sy) | Metachronous(Met) | Primary tumor site | Pancreatic site | Pancreatic  surgery | Overall survival Months (mo) |
| --- | --- | --- | --- | --- | --- | --- | --- | --- | --- | --- |
| 1. | Yang J /2021[10] | 59 | M | 50 | - | 1 | Sigmoid | Head | PD | NA |
| 2. | Yagi Y /2020[13] | 44 | F | 70 | - | 1 | Sigmoid | Tail | DP | NA |
| 3. | Tokuyama S /2016[14] | 50 | F | 55 | - | 1 | Sigmoid | Tail | DP | 40 |
| 4. | Tani R /2019[15] | 70 | M | 64.8 | - | 1 | Rectal | Head | PD | 64.8 |
| 5. | Hirano M /2021[16] | 50 | M | 18 | - | 1 | Sigmoid | Tail | DP | NA |
| 6. | Sano I /2017[17] | 77 | F | 36 | - | 1 | Rectal | Tail | DP | 17 |
| 7. | Numata K /2020 [18] | 68 | F | 42 | - | 1 | Rectal | Tail | DP | NA |
| 8. | Sakai K /2019[19] | 69 | M | 80 | - | 1 | Rectal | Tail | DP | NA |
| 9. | Olesinski T /2019[20] | 69 | F | 52 | - | 1 | Rectal | Tail | DP+ Splenectomy | 49 |
| 10. | Saito M /2019[21] | 71 | M | 120 | - | 1 | Rectal | Tail | DP | NA |
| 11. | Kurihara S /2019[22] | 67 | M | 21 | - | 1 | Colon ascendens | Head | PD | NA |
| 12. | Li Destri G /2014[23] | 68 | M | 0 | 1 | - | Rectal | Head | PD+ Total  colectomy | NA |
| 13. | Ohtsubo K /2013[24] | 77 | M | 0 | 1 | - | Cecal | Head | -- | NA |
| 14. | Tamagawa H /2012[25] | 68 | F | 0 | 1 | - | Rectal | Tail | Colectomy for rectal carcinoma+DP | NA |
| 15. | Lee CW /2010[26] | 76 | F | 24 | - | 1 | Rectal | Tail | DP | NA |
| 16. | Lasithiotakis K /2010[27] | 53 | M | 24 | - | 1 | Colon ascendens | Head | PD | 27 |

PD=pancreaticoduodenectomy DP=distal pancreatectomy NA= not available
